# Supplementary material for: Antiproliferative Effects of the Aptamer d(GGGT)4 and Its Analogues with an Abasic-Site Mimic Loop on Different Cancer Cells
Source: MDPI journal article supplement (doi:10.3390/ijms23115952), 2022-05-25
Supplement: s1 [file s1]

# Supplementary Material

## **Antiproliferative effects of the aptamer d(GGGT)<sub>4</sub> and its analogues with an abasic-site mimic loop on different cancer cells.**

Antonella Virgilio, Annalisa Pecoraro, Daniela Benigno, Annapina Russo, Giulia Russo, Veronica Esposito\* and Aldo Galeone

Department of Pharmacy, University of Naples Federico II, Napoli, Italy.

\*Correspondence: Corresponding author: VE: verespos@unina.it.

## **Table of contents**

MTT assay of Qnat and its analogues at 10  $\mu$ M of ODNs

Cytotoxic activity of Qnat and its analogues on healthy cell line

<sup>1</sup>H-NMR spectra of purified oligomers in D<sub>2</sub>O at 80°C

HPLC traces of Qnat and its analogues

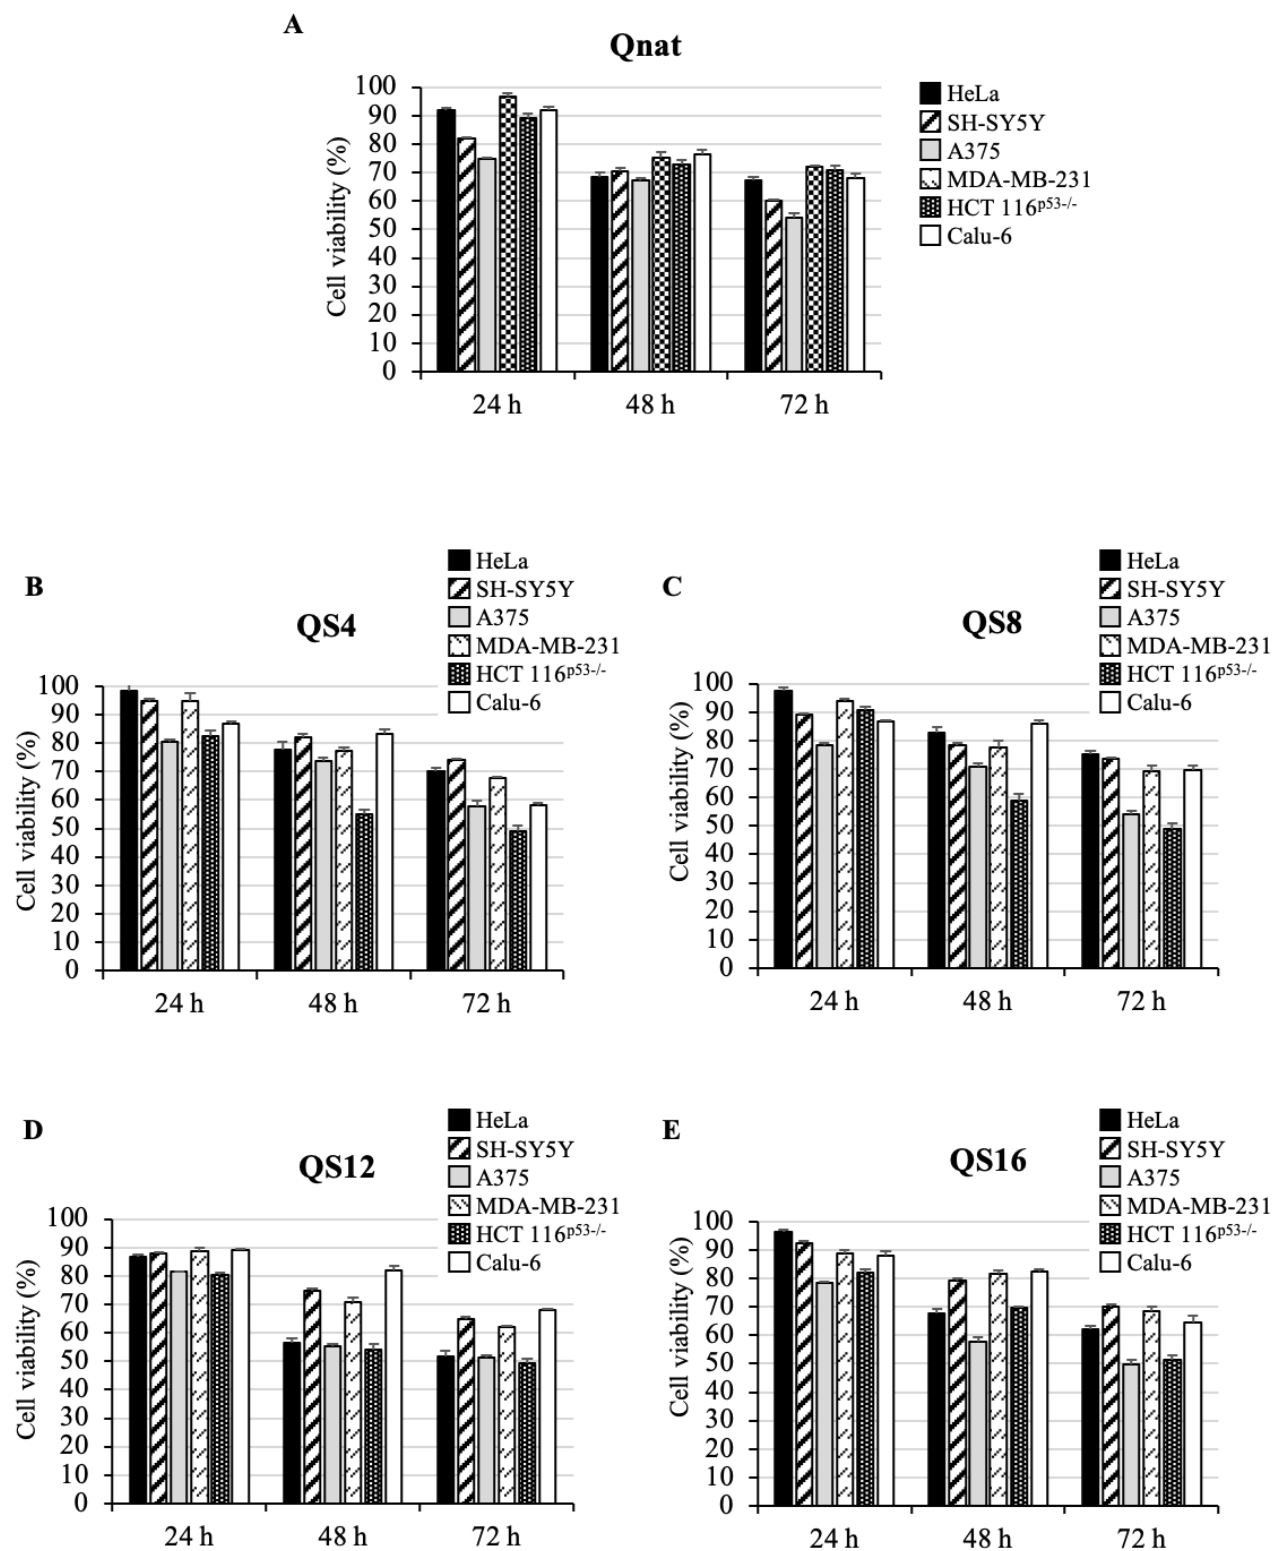

**Figure S1.** Cytotoxic activity of Qnat and its analogues on six different cancer cell lines. Cells were treated with 10  $\mu$ M of ODNs, from 24 to 72 h. Cell viability was assayed using the MTT assay. Data represent the average of three independent experiments; error bars represent the standard deviation.

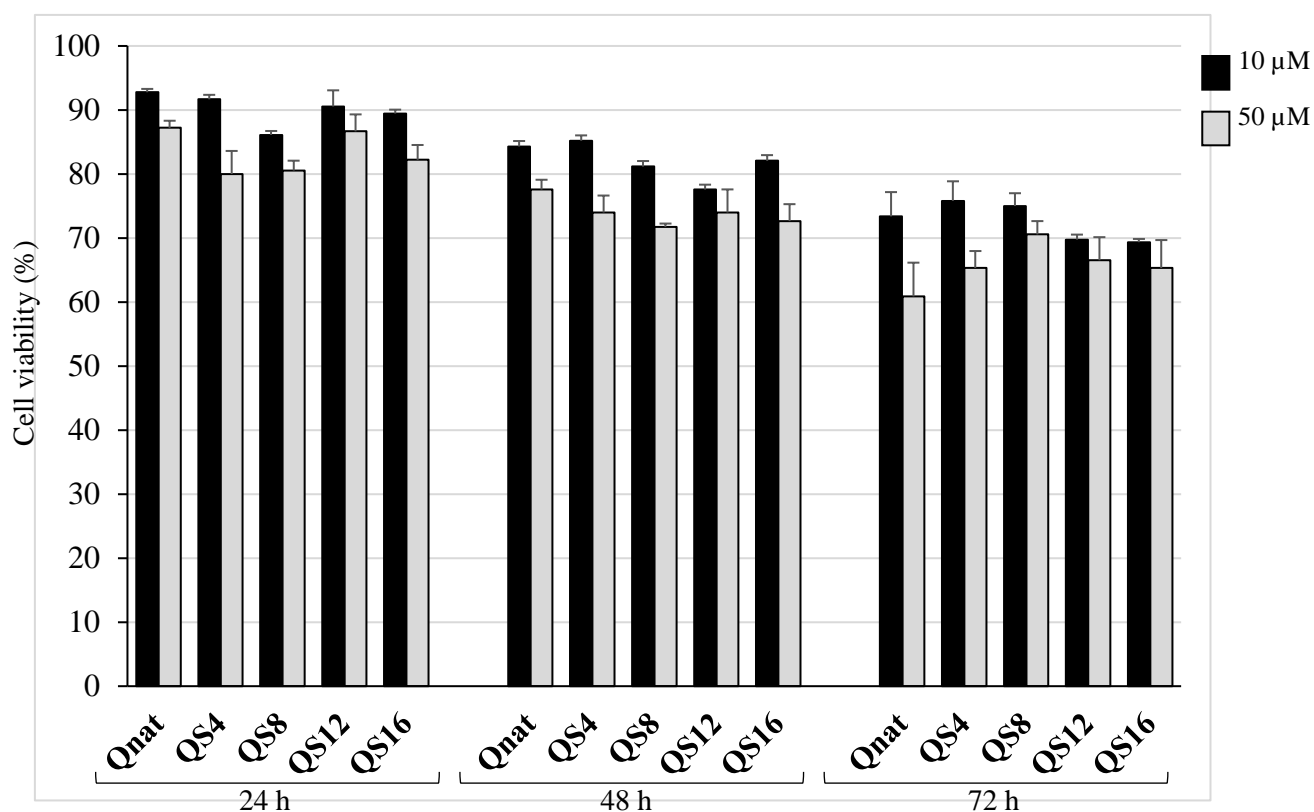

**Figure S2.** Cytotoxic activity of Qnat and its analogues on MRC-5 cell line. Cells were treated with 10  $\mu$ M and 50  $\mu$ M of ODNs, from 24 to 72 h. Cell viability was assayed using the MTT assay. Data represent the average of three independent experiments; error bars represent the standard deviation.

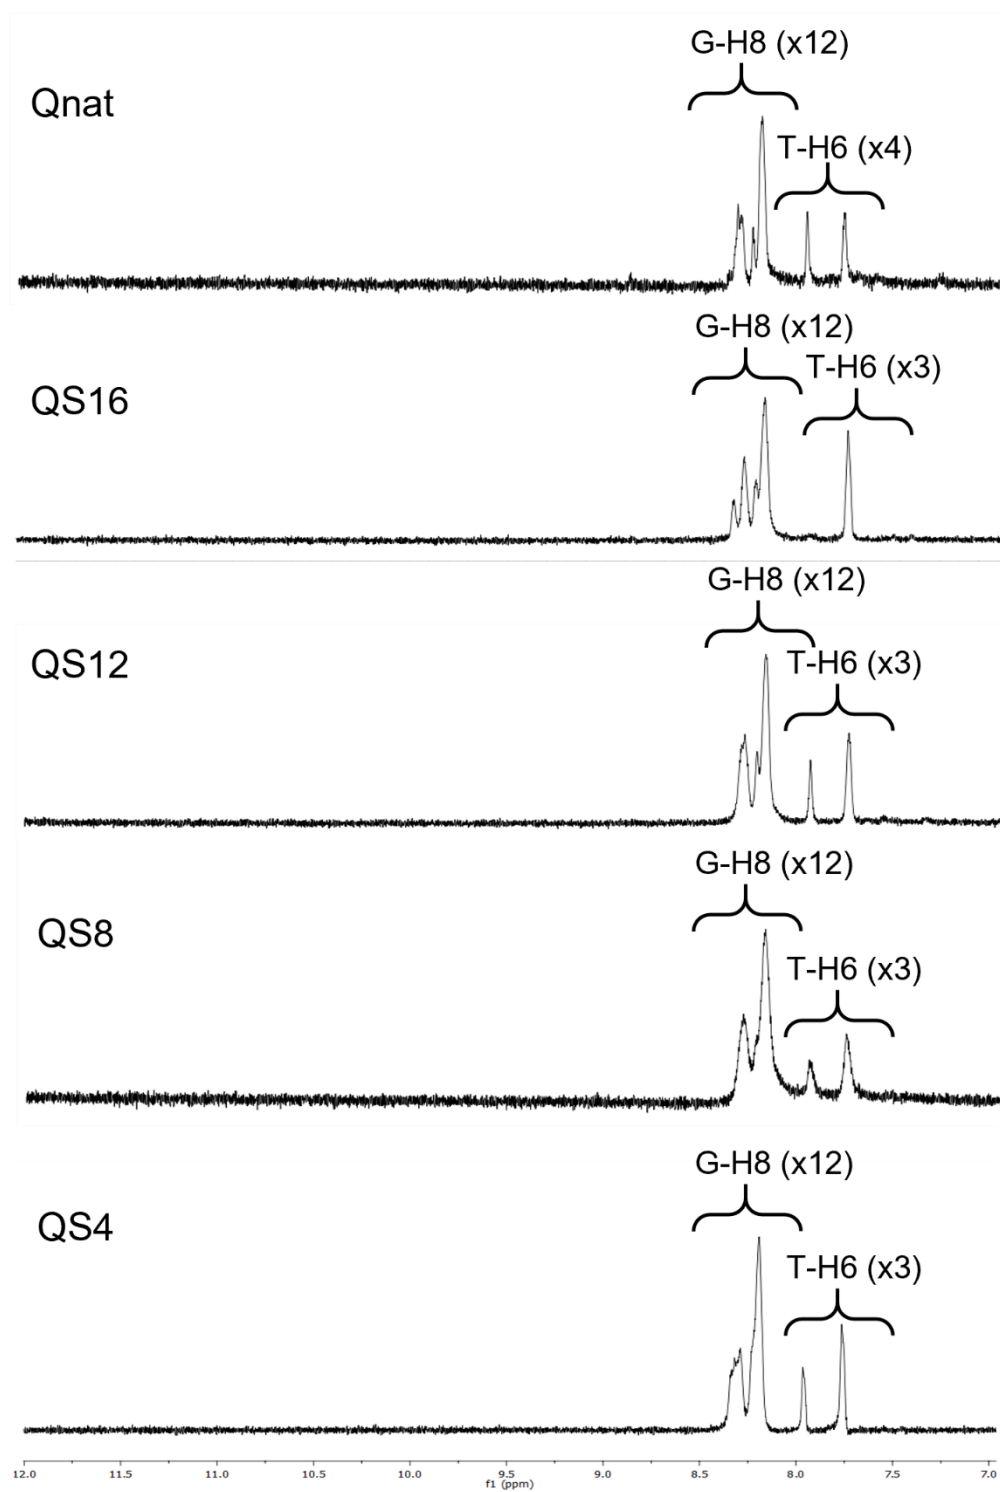

**Figure S3.** Aromatic region of the high resolution NMR spectra (700 MHz, D<sub>2</sub>O, 80°C, no salt) of purified oligomers.

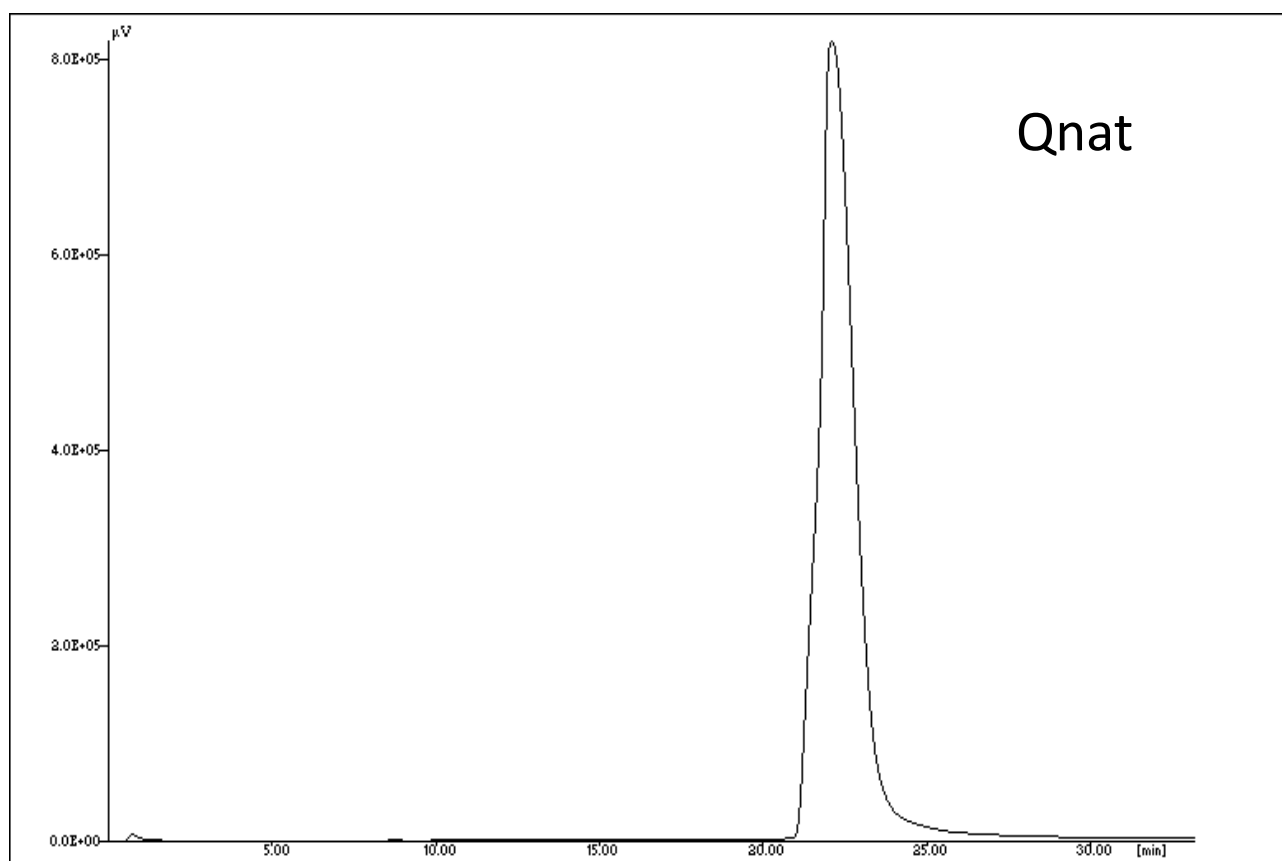

**Figure S4.** HPLC chromatograms of Qnat and its analogues. See experimental section for details

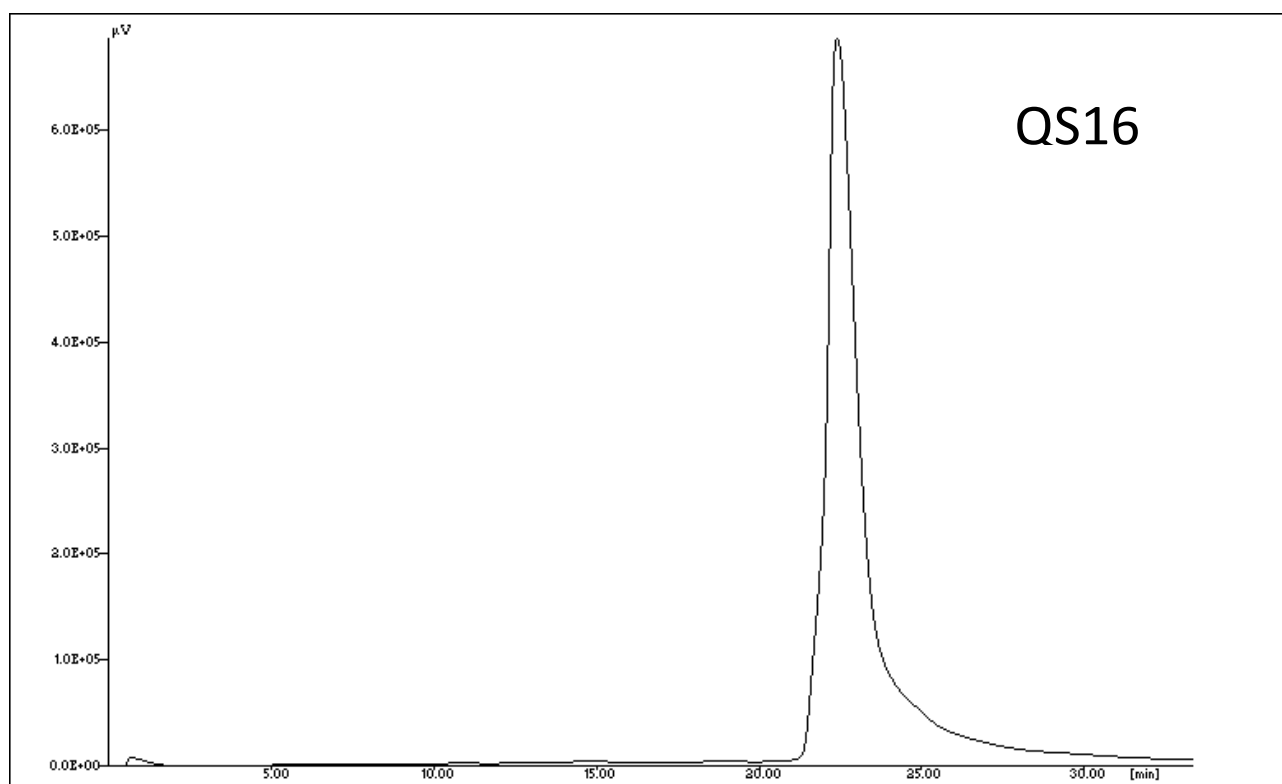

**Figure S4.** *Cont.*

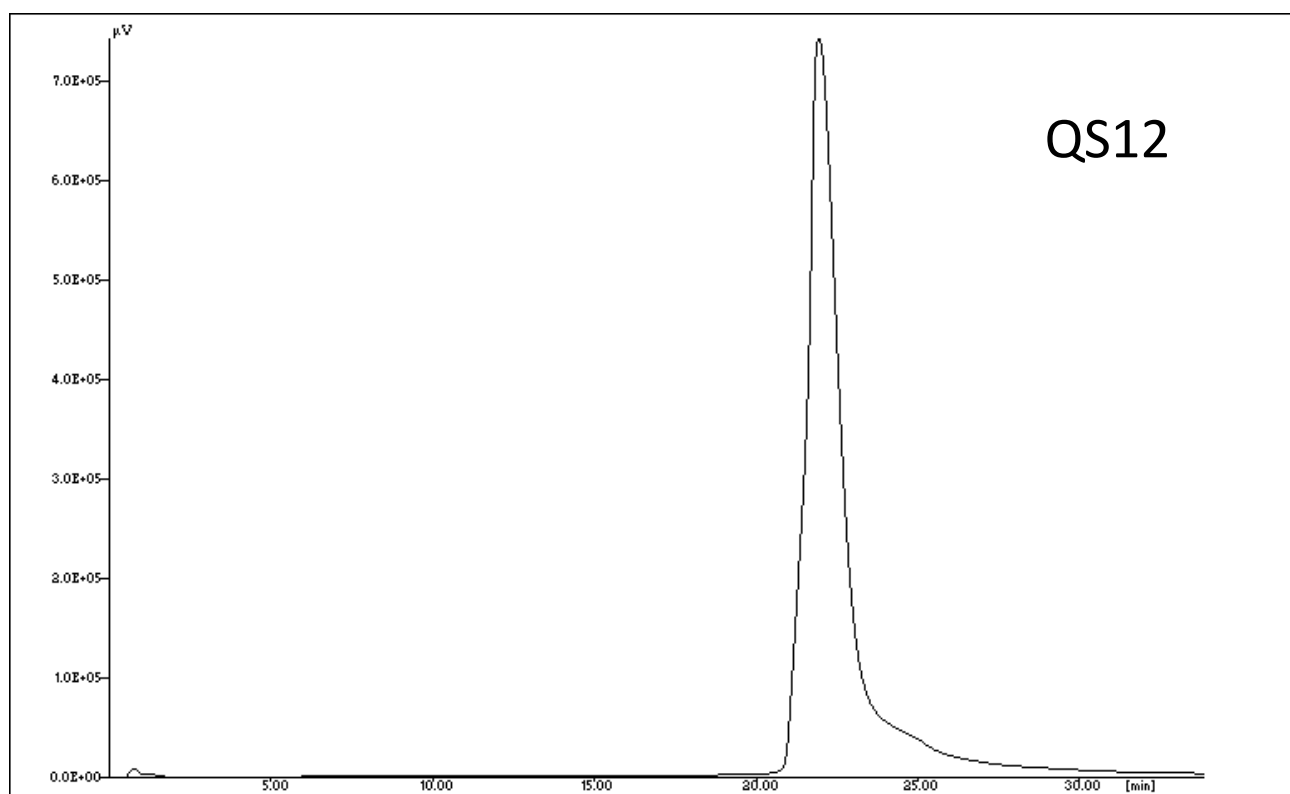

**Figure S4.** *Cont.*

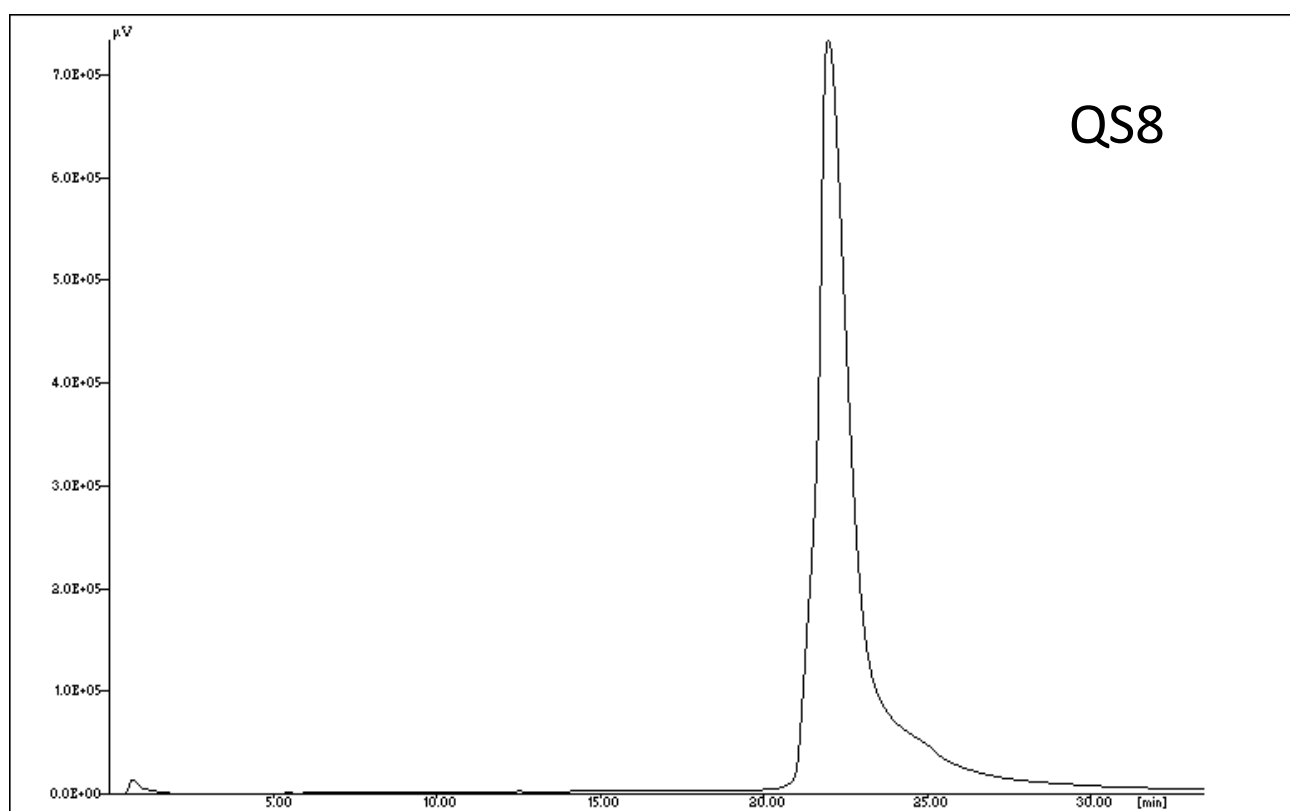

**Figure S4.** *Cont*

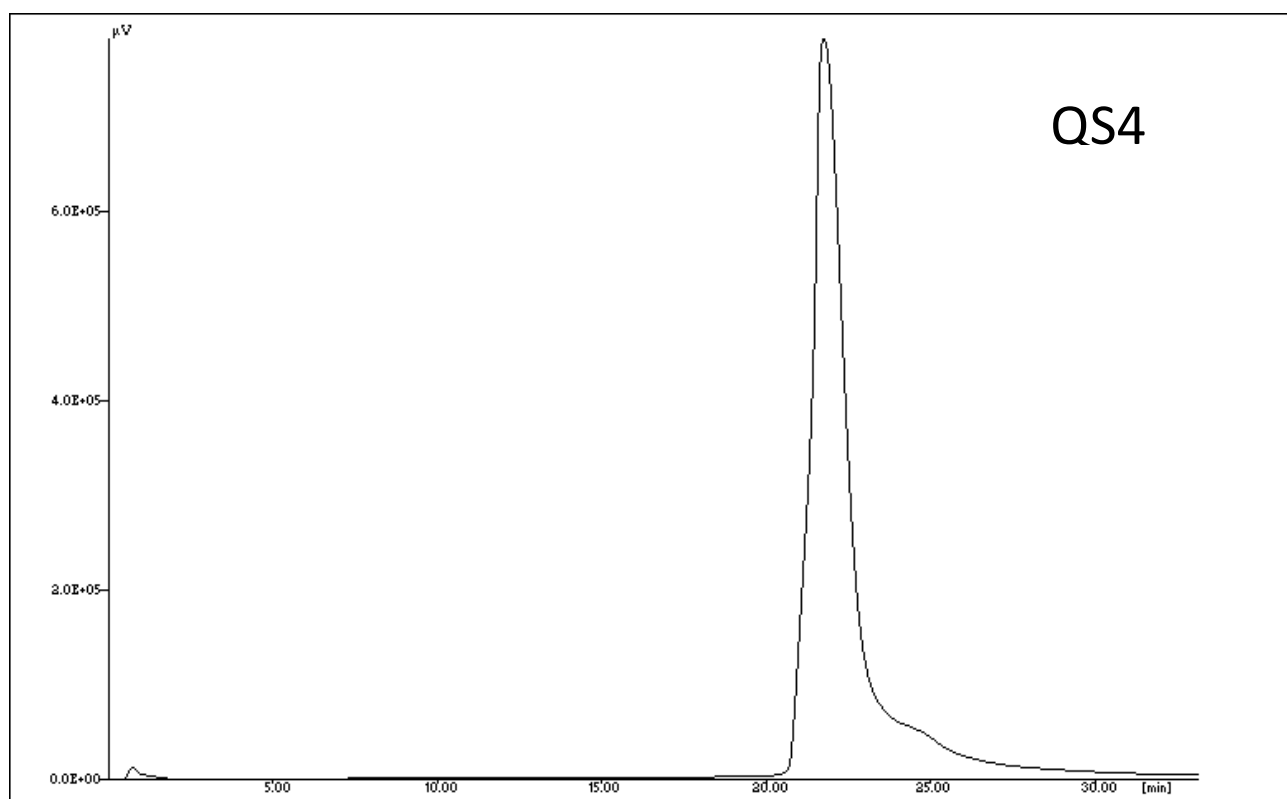

**Figure S4.** *Cont*
